# Supplementary material for: Patient’s subjective knee function 3-5 years following partial meniscectomy or meniscus repair compared to a normal population: a retrospective cohort study
Source: HighWire-hosted journal article supplement (doi:10.1136/bmjsem-2021-001278), 2022-08-01
Supplement: bmjsem-2021-001278supp001_data_supplement.pdf [file bmjsem-2021-001278supp001_data_supplement.pdf]

**Appendix 1:** Mean KOOS score and CI in Suture and APM compared with younger and middle-aged patients. With a 95% confidence interval of the mean difference.

| Group                                                     | Age   | Concurrent ACLR | Number | KOOS Pain              | KOOS Symptoms          | KOOS ADL               | KOOS Sport/Rec          | KOOS QOL               |
|-----------------------------------------------------------|-------|-----------------|--------|------------------------|------------------------|------------------------|-------------------------|------------------------|
| APM                                                       | 18-34 | No              | 50     | 82.8 ± 18.2            | 76.6 ± 19.4            | 88.3 ± 18.6            | 59.1 ± 26.9             | 62.9 ± 25.0            |
|                                                           | 35-54 | No              | 196    | 79.1 ± 20.8            | 75.5 ± 21.9            | 85.3 ± 19.9            | 56.4 ± 31.7             | 59.0 ± 26.7            |
| <b>CI of the difference from mean value (p-value)</b>     |       |                 |        | -9.5 – 2.1<br>(0.470)  | -7.3 – 5.1<br>(0.972)  | -8.8 – 2.8<br>(0.453)  | -11.3 – 6.0<br>(0.744)  | -11.8 – 4.0<br>(0.337) |
| Meniscus suture                                           | 18-34 | No              | 31     | 82.0 ± 15.3            | 72.2 ± 18.3            | 91.4 ± 10.8            | 60.0 ± 29.5             | 59.6 ± 22.9            |
|                                                           | 35-54 | No              | 21     | 84.0 ± 10.5            | 79.8 ± 16.7            | 91.5 ± 10.5            | 54.0 ± 28.0             | 50.1 ± 22.3            |
| <b>CI of the difference from mean value (p-value)</b>     |       |                 |        | -5.0 – 9.0<br>(0.830)  | -2.0 – 17.2<br>(0.150) | -5.8 – 6.0<br>(0.903)  | -21.9 – 9.9<br>(0.359)  | -22.0 – 3.0<br>(0.079) |
| APM                                                       | 18-34 | Yes             | 30     | 81.7 ± 18.1            | 72.1 ± 22.2            | 87.8 ± 18.8            | 61.2 ± 27.2             | 58.0 ± 23.7            |
|                                                           | 35-54 | Yes             | 32     | 85.2 ± 14.1            | 80.7 ± 12.0            | 91.5 ± 14.7            | 61.9 ± 27.1             | 66.7 ± 19.5            |
| <b>CI of the difference from the mean value (p-value)</b> |       |                 |        | -4.6 – 11.6<br>(0.576) | -0.4 – 17.6<br>(0.229) | -4.7 – 12.1<br>(0.371) | -12.8 – 14.2<br>(0.983) | -2.1 – 19.5<br>(0.210) |
| Meniscus suture                                           | 18-34 | Yes             | 39     | 83.9 ± 15.8            | 76.2 ± 19.0            | 92.7 ± 9.9             | 63.5 ± 23.9             | 59.7 ± 22.8            |
|                                                           | 35-54 | Yes             | 22     | 87.8 ± 13.3            | 80.5 ± 16.3            | 93.1 ± 10.9            | 70.0 ± 25.9             | 66.7 ± 22.5            |
| <b>CI of the difference from mean value (p-value)</b>     |       |                 |        | -3.5 – 11.3<br>(0.390) | -4.8 – 13.3<br>(0.479) | -5.1 – 5.9<br>(0.801)  | -6.7 – 19.7<br>(0.227)  | -4.8 – 18.8<br>(0.189) |

**Appendix 2:** Table for KOOS score in younger participants compared to a normal population.

| Group                                                     | Age   | Type of meniscus surgery | Number | KOOS Pain                          | KOOS Symptoms                      | KOOS ADL                            | KOOS Sport/Rec                      | KOOS QOL                            |
|-----------------------------------------------------------|-------|--------------------------|--------|------------------------------------|------------------------------------|-------------------------------------|-------------------------------------|-------------------------------------|
| Solely meniscus surgery                                   | 18-34 | APM                      | 50     | 82.8 ±18.2                         | 76.6 ±19.4                         | 88.3 ±18.6                          | 59.1 ±26.9                          | 62.9 ±25.0                          |
| Population*                                               |       |                          | 134    | 92.1 ± 12.8                        | 88.2 ±13.7                         | 94.8 ±10.9                          | 85.8 ±21.0                          | 84.4 ±19.8                          |
| <b>CI of the difference from mean value (p-value)</b>     |       |                          |        | 3.8 – 14.8<br>( <b>&lt;0.001</b> ) | 5.7 – 17.5<br>( <b>&lt;0.001</b> ) | 1.0 – 12.0<br>( <b>&lt;0.001</b> )  | 18.4 -35.0<br>( <b>&lt;0.001</b> )  | 13.8 – 29.2<br>( <b>&lt;0.001</b> ) |
| Solely meniscus surgery                                   | 18-34 | Meniscus Suture          | 31     | 82.0 ±15.3                         | 72.2 ±18.3                         | 91.4 ±10.8                          | 60.0 ±29.5                          | 59.6 ±22.9                          |
| Population*                                               |       |                          | 134    | 92.1 ± 12.8                        | 88.2 ±13.7                         | 94.8 ±10.9                          | 85.8 ±21.0                          | 84.4 ±19.8                          |
| <b>CI of the difference from mean value (p-value)</b>     |       |                          |        | 4.3 – 15.9<br>( <b>&lt;0.001</b> ) | 9.2 – 22.8<br>( <b>&lt;0.001</b> ) | -0.8 – 7.6<br>(0.082)               | 14.8 – 36.8<br>( <b>&lt;0.001</b> ) | 16.1 – 33.5<br>( <b>&lt;0.001</b> ) |
| Concurrent ACLR                                           | 18-34 | APM                      | 30     | 81.7 ±18.1                         | 72.1 ±22.2                         | 87.8 ±18.8                          | 61.2 ±27.2                          | 58.0 ±23.7                          |
| Population*                                               |       |                          | 134    | 92.1 ± 12.8                        | 88.2 ±13.7                         | 94.8 ±10.9                          | 85.8 ±21.0                          | 84.4 ±19.8                          |
| <b>CI of the difference from the mean value (p-value)</b> |       |                          |        | 3.6 – 17.2<br>( <b>&lt;0.001</b> ) | 7.8 – 24.4<br>( <b>&lt;0.001</b> ) | 0.02 – 14.0<br>( <b>&lt;0.001</b> ) | 14.2 – 35.0<br>( <b>&lt;0.001</b> ) | 17.3 – 35.5<br>( <b>&lt;0.001</b> ) |
| Concurrent ACLR                                           | 18-34 | Meniscus suture          | 39     | 83.9 ±15.8                         | 76.2 ±19.0                         | 92.7 ±9.9                           | 63.5 ±23.9                          | 59.7 ±22.8                          |
| Population*                                               |       |                          | 134    | 92.1 ± 12.8                        | 88.2 ±13.7                         | 94.8 ±10.9                          | 85.8 ±21.0                          | 84.4 ±19.8                          |
| <b>CI of the difference from mean value (p-value)</b>     |       |                          |        | 2.8 – 13.6<br>( <b>&lt;0.001</b> ) | 5.6 – 18.4<br>( <b>&lt;0.001</b> ) | -1.5 – 5.7<br>(0.229)               | 14.0 – 30.6<br>( <b>&lt;0.001</b> ) | 16.8 – 32.6<br>( <b>&lt;0.001</b> ) |

**Appendix 3:** Table for KOOS score in middle-aged participants compared to a normal population.

| Group                                               | Age   | Type of meniscus surgery | Number | KOOS Pain                  | KOOS Symptoms              | KOOS ADL              | KOOS Sport/Rec              | KOOS QOL                    |
|-----------------------------------------------------|-------|--------------------------|--------|----------------------------|----------------------------|-----------------------|-----------------------------|-----------------------------|
| Solely meniscus surgery                             | 35-54 | APM                      | 196    | 79.1 ±20.8                 | 75.5 ±21.9                 | 85.3 ±19.9            | 56.4 ±31.7                  | 59.0 ±26.7                  |
| Population*                                         |       |                          | 158    | 88.1 ±18.3                 | 88.0 ±16.7                 | 88.8 ±18.7            | 77.7 ±28.6                  | 80.6 ±23.7                  |
| <b>CI of the difference in mean value</b>           |       |                          |        | 4.9 – 13.0<br>( $<0.001$ ) | 8.5 – 16.5<br>( $<0.001$ ) | -0.5 – 7.5<br>(0.009) | 15.0 – 27.6<br>( $<0.001$ ) | 16.3 – 26.9<br>( $<0.001$ ) |
| Solely meniscus surgery                             | 35-54 | Meniscus Suture Repair   | 21     | 84.0 ±10.5                 | 79.8 ± 16.7                | 91.5 ±10.5            | 54.0 ±28.0                  | 50.1 ±22.3                  |
| Population*                                         |       |                          | 158    | 88.1 ±18.3                 | 88.0 ±16.7                 | 88.8 ±18.7            | 77.7 ±28.6                  | 80.6 ±23.7                  |
| <b>CI of the difference in mean value</b>           |       |                          |        | -1.2 – 9.4<br>(0.305)      | 0.6 – 15.8<br>(0.024)      | -8.1 – 2.7<br>(0.508) | 10.9 – 36.5<br>( $<0.001$ ) | 20.3 – 40.7<br>( $<0.001$ ) |
| Concurrent ACLR                                     | 35-54 | APM                      | 32     | 85.2 ±14.1                 | 80.7 ±12.0                 | 91.5 ±14.7            | 61.9 ±27.1                  | 66.7 ±19.5                  |
| Population*                                         |       |                          | 158    | 88.1 ±18.3                 | 88.0 ±16.7                 | 88.8 ±18.7            | 77.7 ±28.6                  | 80.6 ±23.7                  |
| <b>CI of the difference in mean value (p-value)</b> |       |                          |        | -2.8 – 8.6<br>(0.370)      | 2.4 – 12.2<br>(0.013)      | -8.6 – 3.2<br>(0.414) | 5.4 – 26.2<br>(0.002)       | 6.2 – 21.6<br>(0.001)       |
| Concurrent ACLR                                     | 35-54 | Meniscus Suture Repair   | 22     | 87.8 ±13.3                 | 80.5 ±16.3                 | 93.1 ±10.9            | 70.0 ±25.9                  | 66.7 ±22.5                  |
| Population*                                         |       |                          | 158    | 88.1 ±18.3                 | 88.0 ±16.7                 | 88.8 ±18.7            | 77.7 ±28.6                  | 80.6 ±23.7                  |
| <b>CI of the difference in mean value (p-value)</b> |       |                          |        | -5.9 – 6.5<br>(0.939)      | 0.2 – 14.8<br>(0.035)      | -9.7 – 1.1<br>(0.281) | -4.0 – 19.4<br>(0.207)      | 3.8 – 24.0<br>(0.006)       |

\*Population data from Paradowski et al [22]
